# Supplementary material for: Enhanced biocompatibility and osteogenic differentiation of mesenchymal stem cells of titanium by Sr–Ga clavate double hydroxides
Source: Royal Society of Chemistry journal article supplement (doi:10.1039/d1tb00805f), 2021-01-01
Supplement: d1tb00805f1.pdf [file d1tb00805f1.pdf]

## Supporting Information

### **Enhanced Biocompatibility and Osteogenic Differentiation of Mesenchymal Stem Cells of Titanium by Sr-Ga Clavate Double Hydroxides**

Maowen Chen<sup>a, 1</sup>, Bailong Tao<sup>b, 1</sup>, Yan Hu<sup>a\*</sup>, Menghuan Li<sup>c</sup>, Maohua Chen<sup>a</sup>, Lu Tan<sup>a</sup>,  
Zhong Luo<sup>c\*</sup>, Kaiyong Cai<sup>a\*</sup>

<sup>a</sup>Key Laboratory of Biorheological Science and Technology, Ministry of Education, College of Bioengineering, Chongqing University, Chongqing 400044, China.

<sup>b</sup>Laboratory Research Center, The First Affiliated Hospital of Chongqing Medical University, Chongqing, 400016, China.

<sup>c</sup>School of Life Science, Chongqing University, Chongqing 400044, China

\*Corresponding author: Professor Yan Hu,

Professor Zhong Luo & Professor Kaiyong Cai

E-mail: huyan303@cqu.edu.cn; luozhong918@cqu.edu.cn; kaiyong\_cai@cqu.edu.cn.

<sup>1</sup> Co-first authors: these authors contributed equally to this work.

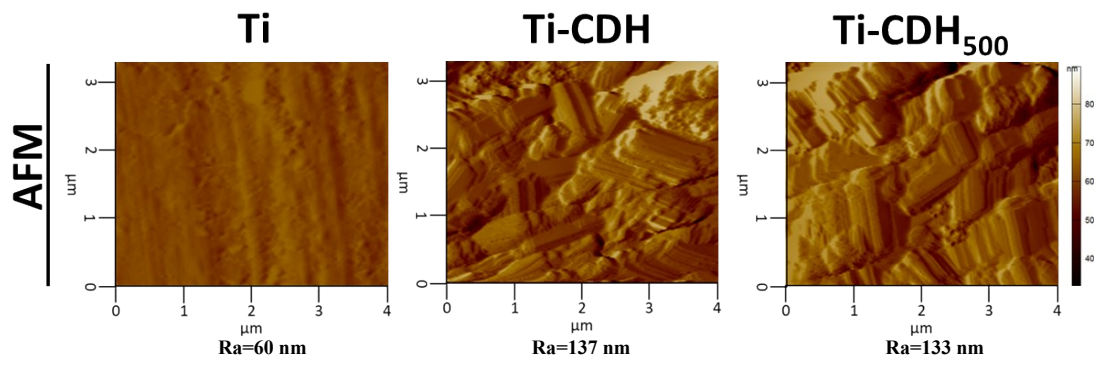

**Fig. S1.** AFM images of Ti, Ti-CDH and Ti-CDH<sub>500</sub> groups.

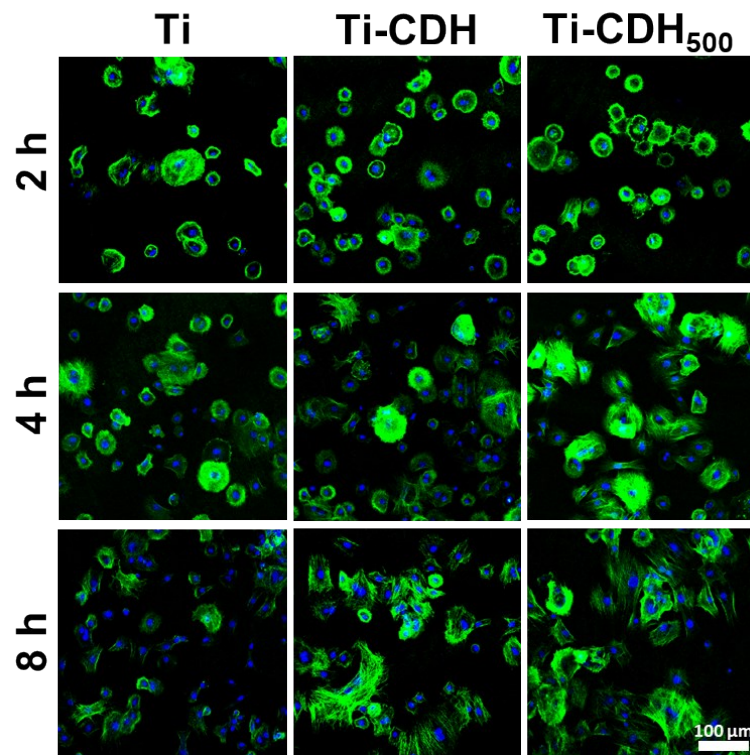

**Fig. S2.** (A) Initial MSCs adhesion on various Ti substrates for 2, 4, and 8 h with cytoskeleton staining.

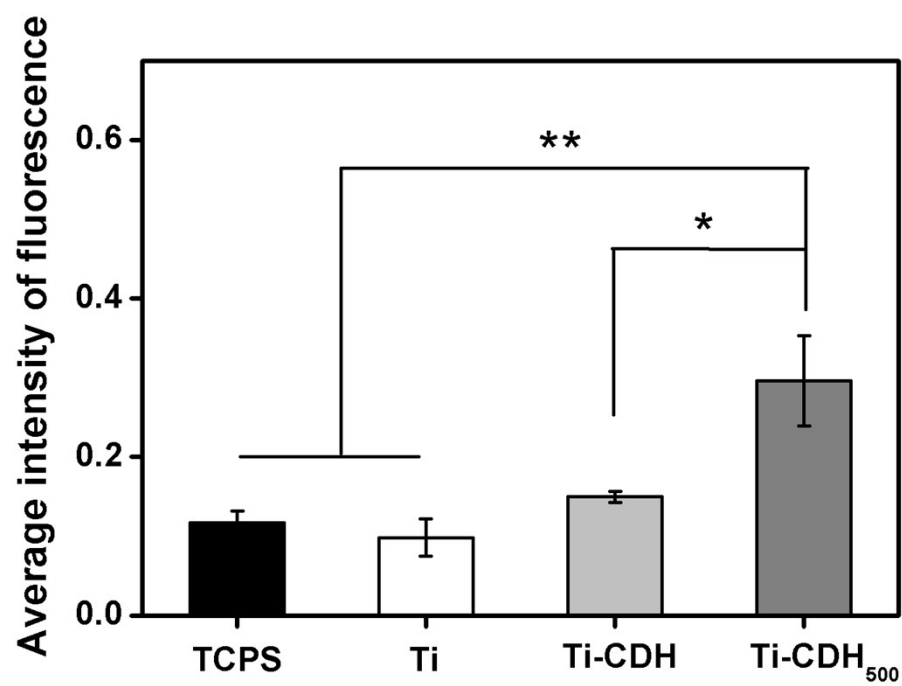

**Fig. S3.** Average intensity of fluorescence statistics. Error bars represent means  $\pm$  SD,  $n=3$ ,  $*p < 0.05$ ,  $**p < 0.01$ .

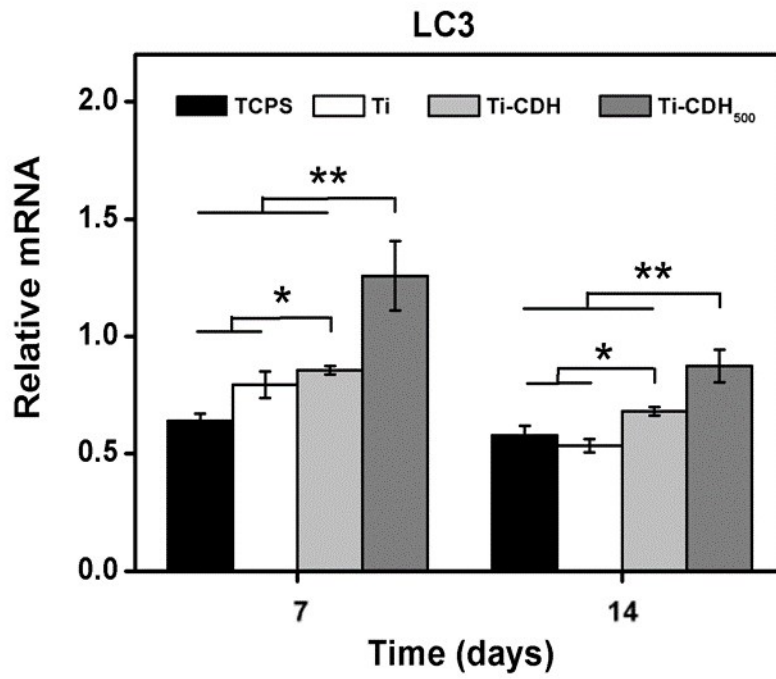

**Fig. S4.** Relative mRNA expression of several autophagic related genes (LC3) in MSCs treated by various samples for 7 and 14 days, respectively. Error bars represent means ± SD, n=3, \*p < 0.05, \*\*p < 0.01.

**Table S1.** Statistics of chemical compositions on the surface of different substrates.

| <i>Samples</i>     | <i>Elemental content (wt%)</i> |       |       |       |       |
|--------------------|--------------------------------|-------|-------|-------|-------|
|                    | Ti                             | O     | C     | Sr    | Ga    |
| Ti                 | 88.95                          | 5.79  | 4.40  | —     | —     |
| CDH                | —                              | 26.55 | 10.21 | 34.77 | 20.62 |
| CDH <sub>500</sub> | —                              | 28.98 | 10.12 | 25.69 | 28.06 |

**Table S2. Real-time polymerase chain reaction primers used in this study.**

| <i>Target gene</i> | <i>Primers</i>                                       | <i>Product size (bp)</i> |
|--------------------|------------------------------------------------------|--------------------------|
| ALP                | AGCGACACGGACAAGAAGC<br>GGCAAAGACCGCCACATC            | 183                      |
| OPG                | GCCCAGACGAGATTGAGAG<br>CAGACTGTGGGTGACGGTT           | 173                      |
| OPN                | GACAGCAACGGGAAGACC<br>CAGGCTGGCTTTGGAAC              | 216                      |
| BMP2               | AGATTGTTGGGGCACAAGGT<br>CCTTCAGCAGGGAAACCGAT         | 191                      |
| GAPDH              | CATCCGTAAAGACCTCTATGCCAA<br>C<br>ATGGAGCCACCGATCCACA | 223                      |
